# Supplementary material
Source: Springer Nature journal article supplement (https://www.springermedizin.de/resource/supplementary/12889_2012_4460_MOESM1_ESM.pdf/9493066)

Symptoms, contagious condition, functioning of daily life

Experienced degree of illness

Considerations in the process of choosing absence or attendance when ill

Daily life habits

Routine and non-reflexive practice, habits from childhood

The importance of the job

Loyalty to the company, job content, psychosocial work environment

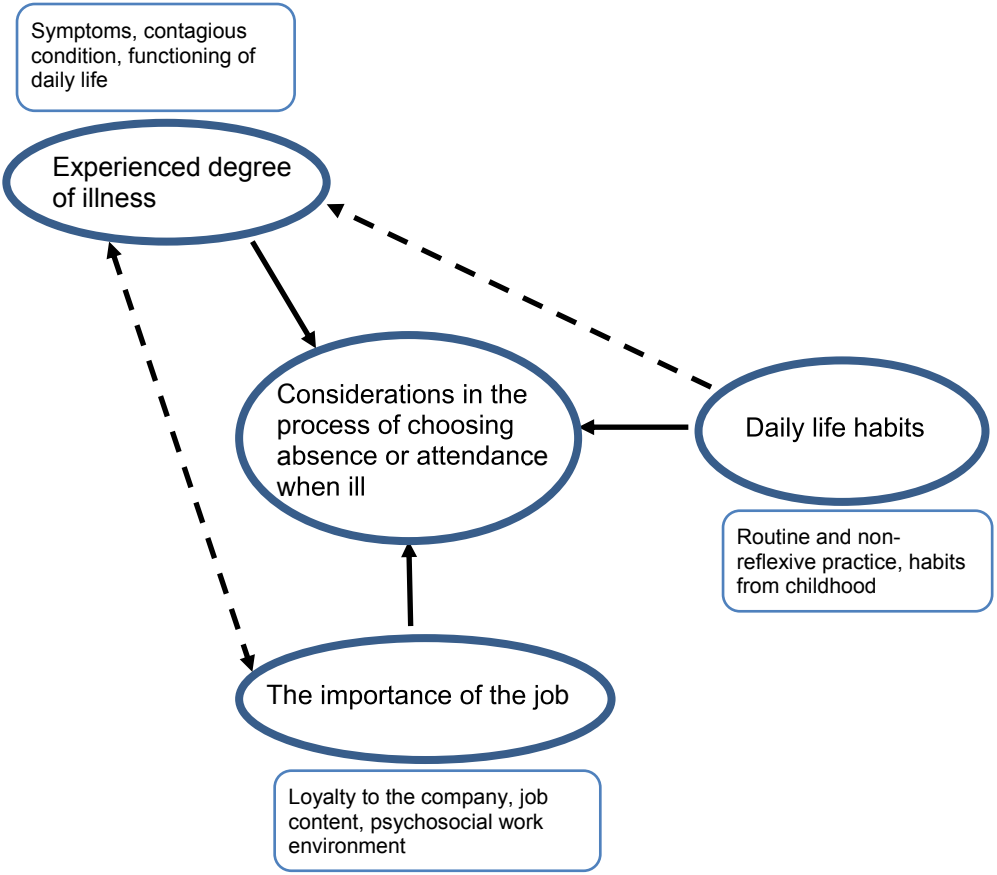

Supplement: MOESM1 [file 9493066]
